# Supplementary material
Source: publisher site journal article supplement (http://scielo.br/pdf/rmat/v22s1/1517-7076-rmat-22-suppl-e11918.pdf)
Supplement: Supplementary file 1 [file 1517-7076-rmat-22-suppl-e11918.pdf]

## Produção e caracterização de óxido de grafeno e óxido de grafeno reduzido com diferentes tempos de oxidação

### Production and characterization of graphene oxide and reduced graphene oxide with different oxidation times

Géssica Seara Faria<sup>1</sup>, Andreza Menezes Lima<sup>1</sup>, Luiz Paulo Brandão<sup>1</sup>,  
Alberto Pessoa da Costa<sup>1</sup>, Stefania Nardecchia<sup>2</sup>,  
Alexandre Antunes Ribeiro<sup>3</sup>, Wagner Anacleto Pinheiro<sup>1</sup>

<sup>1</sup> Instituto Militar de Engenharia – IME – SE4 – Praça General Tibúrcio, 80, Urca CEP: 22290-270, Rio de Janeiro, RJ  
e-mail: gessica.seara.faria@gmail.com

<sup>2</sup> Pontifícia Universidade Católica do Rio de Janeiro – PUC-Rio - Rua Marquês de São Vicente, 225, Gávea CEP: 22451-900, Rio de Janeiro, RJ

<sup>3</sup> Instituto Nacional de Tecnologia – INT - Av. Venezuela, 82, Saúde CEP: 20081-312, Rio de Janeiro - RJ  
e-mail: andrezamenezeslima@gmail.com; brandao@ime.eb.br; albertpess@gmail.com; stefanianardecchia@yahoo.it; alexandre.antunes@int.gov.br; anacleto@ime.eb.br

#### RESUMO

Neste trabalho foram preparadas dispersões aquosas de óxido de grafeno (GO) e óxido de grafeno reduzido (rGO), em diferentes tempos de oxidação, com o objetivo de verificar a influência do tempo de oxidação em relação às características das folhas (*flakes*) finais. As dispersões de GO foram preparadas pelo método de Hummers modificado utilizando os seguintes tempos de oxidação: 4 h; 1 dia; 3 dias; 7 dias e 10 dias. Em seguida, as dispersões de GO foram submetidas ao tratamento de redução com ácido ascórbico, obtendo-se o rGO. As caracterizações das amostras foram realizadas por meio das análises de espectroscopia Raman, espectroscopia de fotoelétrons excitados por raios X (XPS), microscopia eletrônica de varredura (MEV) e difração de raios X (DRX). A espectroscopia Raman mostrou a variação da relação de intensidade entre as bandas D e G ( $I_D/I_G$ ) à medida que o tempo de oxidação foi aumentado. A análise de XPS exibiu a alteração dos percentuais de carbono (C) e oxigênio (O). Através de análise no MEV foi correlacionada a morfologia dos *flakes* com o aumento do tempo de oxidação. E por fim, com o auxílio de DRX, foi verificada a variação da distância interplanar.

**Palavras-chave:** óxido de grafeno, óxido de grafeno reduzido, tempo de oxidação.

#### ABSTRACT

In this work aqueous dispersions of graphene oxide (GO) and reduced graphene oxide (rGO) were prepared in different oxidation times in order to verify the influence of the oxidation time on the characteristics of the final flakes. GO dispersions were prepared by the modified Hummers method, using the following oxidation times: 4 h; 1 day; 3 days; 7 days and 10 days. Afterwards the dispersions of GO were subjected to the reduction treatment with ascorbic acid, obtaining the rGO. Samples were characterized by Raman spectroscopy, X-ray photoelectron spectroscopy (XPS), scanning electron microscopy (SEM) and X-ray diffraction (XRD). Raman spectroscopy showed the variation of the intensity ratio between the D and G bands ( $I_D / I_G$ ) as the oxidation time was increased. The XPS analysis indicated the alteration of the percentages of carbon (C) and oxygen (O). The SEM analysis correlated the morphology of the flakes with the increase of the oxidation time. Finally, with the aid of XRD, the variation of the interplanar distance was verified.

**Keywords:** graphene oxide, reduced graphene oxide, oxidation time.

## 1. INTRODUÇÃO

O grafeno tem sido largamente estudado para inúmeras aplicações, como em sensores químicos, transistores de alta velocidade, displays flexíveis, células solares, supercapacitores, componentes para aviões e automóveis, dentre outras [1]. Isso é devido às propriedades superiores que sua estrutura em camadas 2D proporciona, tais como: resistência mecânica, módulo de elasticidade, flexibilidade, transmitância, condutividade elétrica e térmica, quando comparado a outros materiais cristalinos utilizados como condutores, semicondutores, reforços etc. [2, 3].

Para melhor desempenho do grafeno são desejadas camadas finas (*monolayer* ou *few layers*) e grandes (com maiores tamanhos de *flake*), de maneira a minimizar o contato entre as camadas, e conferir melhores propriedades elétricas, térmicas e mecânicas [4].

Uma das etapas mais importantes no processo de esfoliação em fase líquida do grafite é a etapa de oxidação. É esperado que quando maior o tempo de oxidação, o processo de separação das camadas a partir do grafite original ocorra em um maior grau [5] (HIRATA et al., 2004). Porém, as faixas de tempo citadas na literatura são normalmente de algumas horas. Na literatura, há trabalhos que empregam tempos muito baixos de oxidação, como o de CONTRERAS e BRIONES [6], no qual o máximo utilizado foi de 3 horas, enquanto outros trabalhos utilizam tempos de alguns dias, como no de ROUKE *et al.* [7], no qual foi de 7 dias.

Este trabalho teve por objetivo produzir dispersões aquosas de GO e rGO, com diferentes tempos de oxidação em uma ampla faixa de variação (de 4 h a 10 dias), e avaliar a influência que este parâmetro exerce sobre as propriedades do grafeno obtido.

## 2. MATERIAIS E MÉTODOS

### 2.1 Produções das dispersões de GO

Foram preparadas dispersões de GO e rGO a partir de 10 g do grafite Graflake 99550, fornecido pela empresa Nacional de Grafite. Foi escolhida a técnica de esfoliação em fase líquida por rota química, método introduzido por HUMMERS e OFFEMAN [8] e modificado por ROUKE *et al.* [7]. A etapa de intercalação foi realizada através de adições de 338 ml de ácido sulfúrico a 95% ( $H_2SO_4$ ) e 7,6 g de nitrato de sódio ( $NaNO_3$ ) seguida por agitação magnética durante 2 horas.

A etapa de oxidação foi conduzida pela adição gradual de 12 partes de 4,125 g (total de 49,5 g) de permanganato de potássio ( $KMnO_4$ ) a cada 10 min, sendo que, após a última adição, a mistura permaneceu sob agitação em um tempo de oxidação variável. Neste trabalho, as dispersões de GO foram produzidas de acordo com os seguintes tempos: 4 h, 1 dia, 3 dias, 7 dias e 10 dias, assim estando a maioria das amostras em uma faixa de tempo entre os extremos encontrados na literatura. Ao final de cada período de oxidação foi realizada a etapa de esfoliação, conduzida por adições de solução de  $H_2SO_4$  a 5% mantida por 3 h sob agitação magnética, seguida por adição de peróxido de hidrogênio ( $H_2O_2$ ) a 30 volumes, permanecendo 2 h sob agitação, e finalizando com a continuação da etapa de esfoliação/lavagem, com solução de  $H_2SO_4$  a 3% e  $H_2O_2$  a 0,5% com tempo de agitação de 12 h. As etapas seguintes de esfoliação/lavagem consistiram na centrifugação das dispersões, em centrífuga Hettich ROTINA 420R, a 9300 rpm, e descarte do sobrenadante, seguida de novas adições da solução de  $H_2SO_4$  a 3% e  $H_2O_2$  a 0,5%, processo este repetido doze vezes. Ao final foram realizadas cinco lavagens utilizando água deionizada em substituição à solução.

Estão relacionados na Tabela 1 os volumes correspondentes às soluções utilizadas em cada etapa de acordo com o tempo de oxidação empregado.

**Tabela 1:** Relação entre o tempo de oxidação e as quantidades envolvidas em cada etapa.

| Tempo de oxidação | Volume retirado (ml) | Peso de grafite correspondente (g) | Solução de Esfoliação (ml) | Solução de $H_2O_2$ (g) | Solução de Esfoliação/ Lavagem (ml) |
|-------------------|----------------------|------------------------------------|----------------------------|-------------------------|-------------------------------------|
| 4 h               | 80                   | 2                                  | 242                        | 6,6                     | 200                                 |
| 1 dia             | 40                   | 1                                  | 121                        | 3,3                     | 100                                 |
| 3 dias            | 40                   | 1                                  | 121                        | 3,3                     | 100                                 |
| 7 dias            | 200                  | 5                                  | 605                        | 16,5                    | 500                                 |
| 10 dias           | 40                   | 1                                  | 121                        | 3,3                     | 100                                 |

## 2.2 Produção das dispersões de rGO

A fim de evitar aglomerações irreversíveis que ocorrem durante a etapa de redução em função da eliminação dos grupos funcionais presentes no GO e que são responsável por seu caráter hidrofílico, foi realizada uma etapa de funcionalização das dispersões de GO com o polímero Poli (4-estireno sulfonato de sódio) (PSS), com fórmula molecular  $(C_8H_7NaO_3S)_n$ , adquirido da empresa Sigma-Aldrich (produto 561967), na proporção de 10:1 em massa de polímero:GO. A funcionalização do GO foi realizada com base no trabalho de STANKOVICH *et al.* [9].

A etapa de redução, baseada no trabalho de FERNANDEZ-MERINO *et al.* [10], foi realizada utilizando-se ácido ascórbico (AA) como agente redutor na proporção de 7:1 em massa de AA:GO, e hidróxido de amônia ( $NH_4OH$ ) para aumentar o pH da dispersão para cerca de 10. Após a realização das misturas, as dispersões foram mantidas em estufa a 80°C durante 72 h. Ao final do período de redução, as dispersões foram lavadas com água deionizada, utilizando também uma centrífuga (Hettich ROTINA 420R), para eliminação do excesso de polímero e da amônia, perfazendo o total de cinco lavagens. Como resultado foram obtidas dispersões de rGO/PSS em que os *flakes* de rGO estão decorados por moléculas de PSS por meio de interações  $\pi$ - $\pi$ .

## 2.3 Caracterizações

As dispersões foram analisadas por meio da técnica de espectroscopia Raman, para verificar possíveis diferenças entre elas. Foi utilizado o espectrômetro confocal NT-MDT NTEGRA, com comprimento de onda do laser de 473 nm, faixa de varredura entre 198 e 3326  $cm^{-1}$ , e tempo de radiação de 100 s.

A espectroscopia de fotoelétrons excitados por raios X (XPS) foi utilizada para caracterizar a composição superficial das amostras em relação ao tempo de oxidação. O ensaio foi realizado em um sistema SPECS 100 operando com dupla radiação Al-K $\alpha$  (energia fóton = 1486,6 eV) e detector 2-DLine na superfície. O espectro XPS foi obtido em um ângulo de 55° de decolagem (ângulo entre a superfície da amostra normal e o eixo da lente do analisador XPS). A varredura foi realizada em um intervalo de energia entre 1280 e 20 eV. As análises dos picos foram realizadas com o auxílio do software CASA-XPS.

Foram obtidos difratogramas por meio da técnica de difração de raios X (DRX), utilizando-se o equipamento X'Pert Pro MPD da PANalytical, com um tubo com fonte de Cu K $\alpha$  ( $\lambda = 1,54 \text{ \AA}$ ), tensão de 45 kV e corrente de 40 mA, empregando a técnica de rotação  $\theta$ -2 $\theta$  acoplados. A varredura em 2 $\theta$  foi executada em um intervalo angular de 5 a 40°, com passo de 0,05° e tempo de 2,5 s por passo. Os ensaios foram realizados na configuração foco linha utilizando o *software Data Collector*.

A morfologia resultante foi analisada por microscopia eletrônica de varredura (MEV), em um microscópio da marca JEOL, com tensão de 5 kV e ampliações de 1000 $\times$ . Em virtude do caráter hidrofóbico do substrato de Si utilizado na preparação das amostras por *spin coating* para observação no MEV, foi necessário realizar um ataque de hidrofilição, chamado RCA (*Critical Cleaning Process*). O processo consistiu em emergir os substratos em uma solução contendo uma proporção de 5:1:1 de  $H_2O:NH_4OH:H_2O_2$  em uma temperatura de 80°C durante o período de 10 min [11]. O tratamento foi realizado para aumentar o caráter hidrofílico do Si, de modo a aumentar a molhabilidade do rGO/PSS sobre Si, em razão do caráter hidrofílico do rGO/PSS.

## 3. RESULTADOS E DISCUSSÃO

Os espectros Raman obtidos para o GO e para o rGO/PSS, de acordo com o tempo da etapa de oxidação durante a produção do GO, são mostrados na Figura 1.

A bandas D e G foram identificadas com deslocamento Raman de aproximadamente 1364 e 1602  $cm^{-1}$  para o GO e de cerca de 1358 e 1589  $cm^{-1}$  para o rGO/PSS, respectivamente. A banda D está relacionada aos defeitos da estrutura em função dos grupos funcionais associados à oxidação.

A relação  $I_D/I_G$ , conforme a evolução do tempo de oxidação, é mostrada na Tabela 2. Para o GO foi observada uma tendência do aumento da relação de intensidade entre as bandas com o aumento do tempo de oxidação; entretanto, o aumento verificado é pequeno ao ponto de poder ser considerado insignificante. A tendência de aumento foi observada até o tempo de oxidação padrão de 7 dias, ocorrendo decréscimo do valor  $I_D/I_G$  ao atingir 10 dias de oxidação.

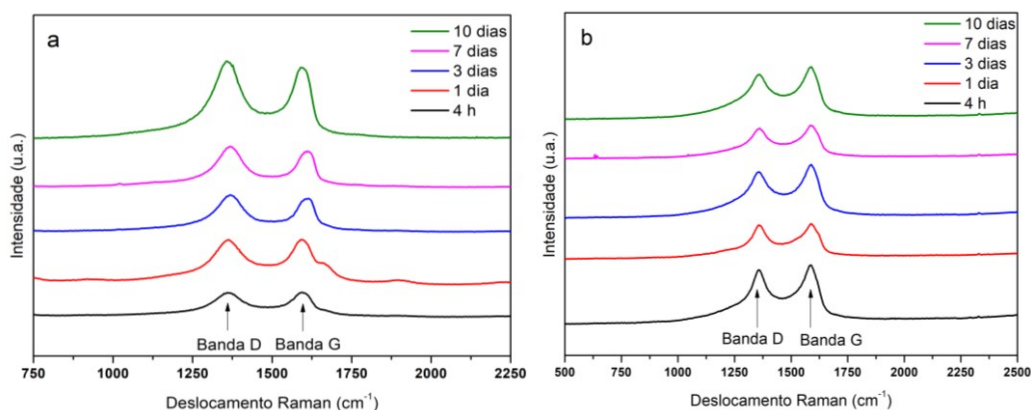

**Figura 1:** Espectros Raman do (a) GO e do (b) rGO/PSS de acordo com o tempo de oxidação.

**Tabela 2:** Relação de intensidade entre as bandas D e G do GO e rGO/PSS.

| Tempo de oxidação | GO ( $I_D/I_G$ ) | rGO/PSS ( $I_D/I_G$ ) |
|-------------------|------------------|-----------------------|
| 4 h               | 0,980            | 0,932                 |
| 1 dia             | 0,995            | 0,971                 |
| 3 dias            | 1,087            | 0,884                 |
| 7 dias            | 1,116            | 0,927                 |
| 10 dias           | 1,078            | 0,876                 |

O aumento da razão  $I_D/I_G$  do GO implica no aumento da quantidade de defeitos, que está associado ao maior nível de oxidação da estrutura do grafeno. A razão de intensidade entre as bandas D e G do rGO/PSS não apresentou uma tendência relacionada ao tempo de oxidação; porém, assim como para o GO, a relação de  $I_D/I_G$  não variou de forma significativa.

A técnica de XPS tem por objetivo a identificação das energias de ligação entre carbono e oxigênio, possibilitando identificar as suas concentrações. Os espectros de ampla varredura obtidos por meio desta técnica são exibidos na Figura 2.

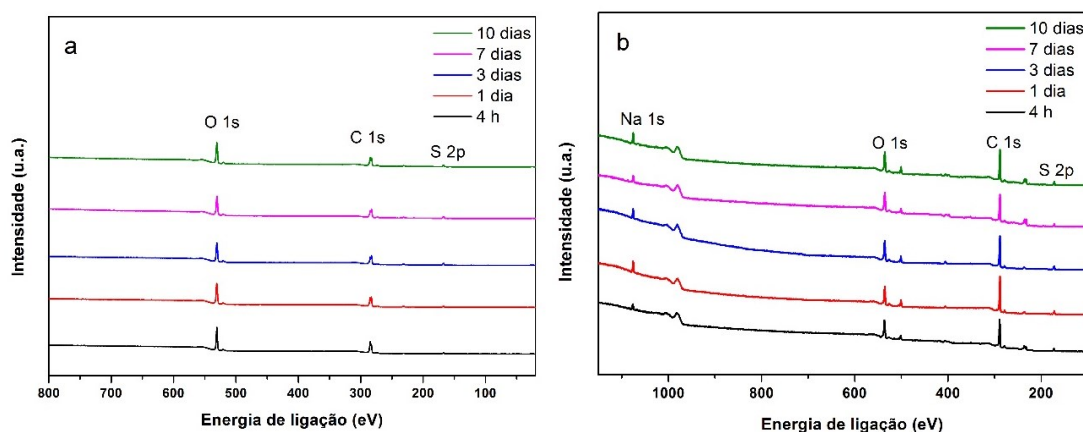

**Figura 2:** Espectro de ampla varredura para as amostras de (a) GO e (b) rGO/PSS conforme o tempo de oxidação.

Nas amostras de GO foram identificados os picos de carbono e oxigênio com energias de ligação de aproximadamente 284,6 e 536,0 eV, respectivamente. Para as amostras de rGO/PSS foram identificados picos de carbono, oxigênio e sódio, sendo o último relacionado a resíduos do polímero PSS, utilizado na etapa de redução. A energia de ligação do sódio é de aproximadamente 1070 eV. Para ambos, GO e rGO, foi veri-

ficada a presença do elemento enxofre que possui energia de ligação de aproximadamente 166 eV.

O enxofre presente nas dispersões está relacionado ao ácido sulfúrico utilizado na etapa de produção e se encontra na forma de grupos estáveis na estrutura, como mostrado no trabalho de EIGLER *et al.* [12].

Estão relacionadas na Tabela 3 as concentrações dos elementos identificados nos espectros XPS das amostras. O aumento do tempo de oxidação do GO foi efetivo em aumentar o nível de oxidação do grafeno, uma vez que o percentual de carbono reduziu enquanto que o de oxigênio aumentou, sendo que a partir de 7 dias essa redução é praticamente insignificante. O rGO/PSS, novamente, não acompanhou uma tendência, mantendo níveis muito próximo de C e O em função do tempo de oxidação.

**Tabela 3:** Percentuais de elementos conforme a área sob os picos dos espectros de XPS das amostras de GO e rGO/PSS.

| Tempo de oxidação | GO              |                 |                 | rGO/PSS         |                 |                 |                  |
|-------------------|-----------------|-----------------|-----------------|-----------------|-----------------|-----------------|------------------|
|                   | C 1s<br>(% at.) | O 1s<br>(% at.) | S 2p<br>(% at.) | C 1s<br>(% at.) | O 1s<br>(% at.) | S 2p<br>(% at.) | Na 1s<br>(% at.) |
| 4 h               | 64,40           | 33,05           | 2,55            | 69,05           | 23,63           | 4,71            | 2,61             |
| 1 dia             | 63,29           | 33,10           | 3,61            | 72,42           | 18,60           | 4,95            | 4,03             |
| 3 dias            | 60,45           | 34,40           | 5,15            | 68,30           | 22,51           | 5,49            | 3,70             |
| 7 dias            | 58,06           | 36,52           | 5,42            | 68,96           | 23,94           | 4,20            | 2,90             |
| 10 dias           | 57,93           | 36,61           | 5,46            | 68,54           | 21,98           | 5,40            | 4,07             |

A Tabela 4 mostra as proporções entre carbono e oxigênio para o GO e rGO/PSS, a partir dos espectros XPS. Esta relação é útil para verificação da diferença de proporção C/O entre o óxido de grafeno produzido e o resultado da sua redução. Segundo CHUA e PUMERA [13], a diminuição na concentração de oxigênio, representada pelo aumento da proporção C/O, indica a eficiência do método de redução utilizado.

A razão atômica C/O do óxido de grafeno normalmente é menor que 3,0 e tipicamente próxima de 2,0 de acordo com BIANCO *et al.* [14]. Já para o rGO a razão é tipicamente aumentada para valores maiores que 10 quando a redução é conduzida por ácido ascórbico e amônia [13]. Em função da utilização do polímero PSS, foram obtidos valores de razão C/O muito mais baixos que o encontrado na literatura, uma vez que a estrutura do PSS é também composta por átomos de oxigênio, em uma relação de C/O de 8/3.

**Tabela 4:** Proporção C/O do GO e rGO/PSS obtida a partir dos espectros de XPS.

| Tempo de oxidação | Proporção C/O |         |
|-------------------|---------------|---------|
|                   | GO            | rGO/PSS |
| 4 h               | 1,95          | 2,92    |
| 1 dia             | 1,91          | 3,89    |
| 3 dias            | 1,76          | 3,03    |
| 7 dias            | 1,59          | 2,88    |
| 10 dias           | 1,58          | 3,12    |

Nas imagens da Figura 3 são exibidos os difratogramas do GO e rGO/PSS, respectivamente. O único pico de difração identificado para todos os casos está relacionado ao plano de difração (002). Tanto para o GO quanto para o rGO/PSS, os picos de difração aparecem deslocados para menores valores de  $2\theta$  em relação ao grafite, indicando aumento da distância interplanar causado pela presença dos grupos funcionais gerados durante a oxidação [15]. Para o grafite natural, utilizado como matéria prima, a difração do pico referente ao plano (002) aparece em  $2\theta$  igual a  $26,5^\circ$ . É importante ressaltar que os picos de difração mostrados estão relacionados aos *flakes* que não são monocamadas (*monolayers*), mas apenas aos que são constituídos de algumas ou várias camadas (*few* ou *multi layers*), uma vez que monocamadas não mostram pico de difração. A diminuição da intensidade dos picos de difração, portanto, indica uma tendência de formação de monocamadas. Com o tempo de oxidação de 7 dias foram obtidas as menores intensidades de pico de difração, o que indica uma maior tendência à presença de monocamadas.

Os menores valores de  $2\theta$  podem ser relacionados com o aumento da distância interplanar através da Lei de Bragg (Equação 1).

$$d = \frac{n\lambda}{2\sin\theta} \quad (1)$$

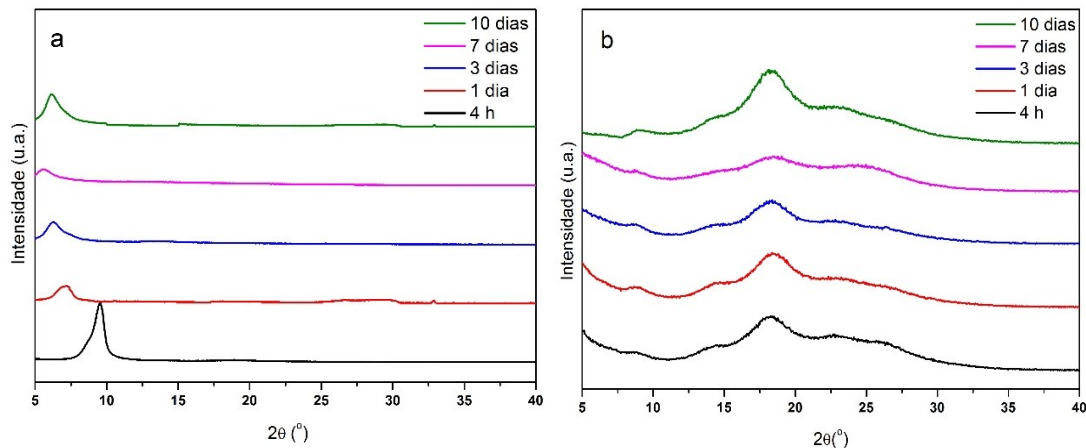

**Figura 3:** Difratogramas do (a) GO e (b) rGO/PSS em função do tempo de oxidação.

Os valores de  $2\theta$  correspondentes aos picos de difração do GO e rGO/PSS estão relacionados na Tabela 5. Com o aumento do tempo de oxidação houve a tendência de redução dos valores de  $2\theta$  do GO, o que implica no aumento do nível de oxidação (mais oxigênio presente entre as camadas), uma vez que, obedecendo a lei de Bragg (Equação 1), quanto maior a distância interplanar, menor será o ângulo de difração. Nota-se que com 7 dias de oxidação foi obtido o maior valor de distância interplanar para o GO, o que está de acordo com o baixo valor de C/O (Tabela 4) e, consequentemente, maior acréscimo de grupos funcionais resultantes da oxidação.

**Tabela 5:** Valores de  $2\theta$  e distância interplanar para o plano de difração (002) do GO e rGO/PSS.

| Tempo de oxidação | GO<br>$2\theta$ (°) | GO - d<br>(nm) | rGO/PSS<br>$2\theta$ (°) | rGO/PSS -<br>(nm) |
|-------------------|---------------------|----------------|--------------------------|-------------------|
| 4 h               | 9,631               | 0,917          | 18,14                    | 0,488             |
| 1 dia             | 7,125               | 1,239          | 18,38                    | 0,482             |
| 3 dias            | 6,267               | 1,409          | 18,26                    | 0,485             |
| 7 dias            | 5,650               | 1,562          | 18,47                    | 0,480             |
| 10 dias           | 6,105               | 1,446          | 18,22                    | 0,486             |

O processo de redução do GO restaura a estrutura do grafeno, removendo uma grande parte dos grupos funcionais intercalados durante a oxidação; como consequência, a distância interplanar é reduzida e maior é o ângulo de difração (Tabela 5). A distância interplanar permaneceu maior que a do grafite natural, o que pode estar associada a presença de grupos funcionais residuais, indicando uma redução incompleta [16]. Segundo PEI e CHENG [17] os grupos de epóxidos e hidroxilas, localizados nos domínios da rede que não apresentam defeitos, são relativamente fáceis de remover, enquanto que aqueles localizados em pontos de defeitos e nas arestas são difíceis de serem removidos completamente.

Uma das características típicas do grafeno é sua flexibilidade [18]. As morfologias do GO e rGO/PSS, analisadas por MEV, são exibidas nas imagens das Figuras 4 e 5, onde é possível confirmar suas flexibilidades evidenciadas pela presença de dobras ao longo das folhas de grafeno.

Nas Figuras 4 (a) e (c), que correspondem aos menores tempo de oxidação (4 h e 1 dia) do GO, já é possível notar um material flexível pela presença de dobras em sua estrutura, porém ainda opaco. As imagens

da Figura 4 (e) e Figuras 5 (a) e (b) mostram um material com maior transparência, o que evidencia a maior esfoliação entre as folhas de óxido de grafeno com o aumento do tempo de oxidação e maior probabilidade de obtenção de monocamadas.

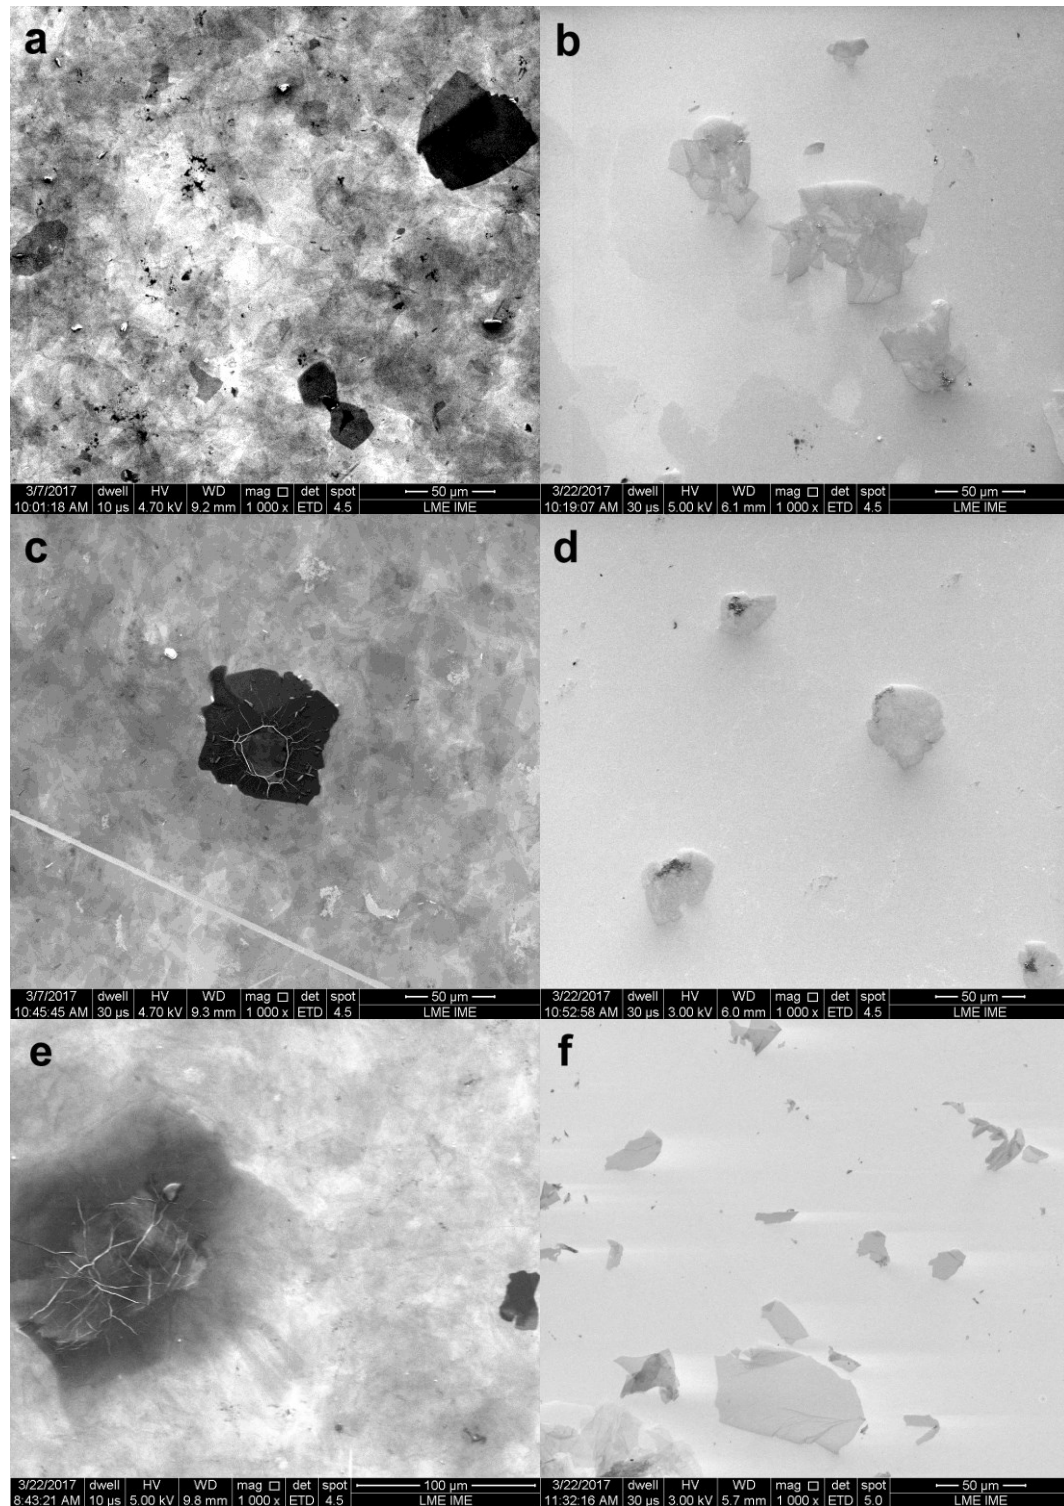

**Figura 4:** Imagens das amostras de GO e rGO/PSS com aumento de 1000×: (a) GO-4 h, (b) rGO/PSS-4 h, (c) GO-1 dia, (d) rGO/PSS-1 dia, (e) GO-3 dias, (f) rGO/PSS-3 dias de oxidação.

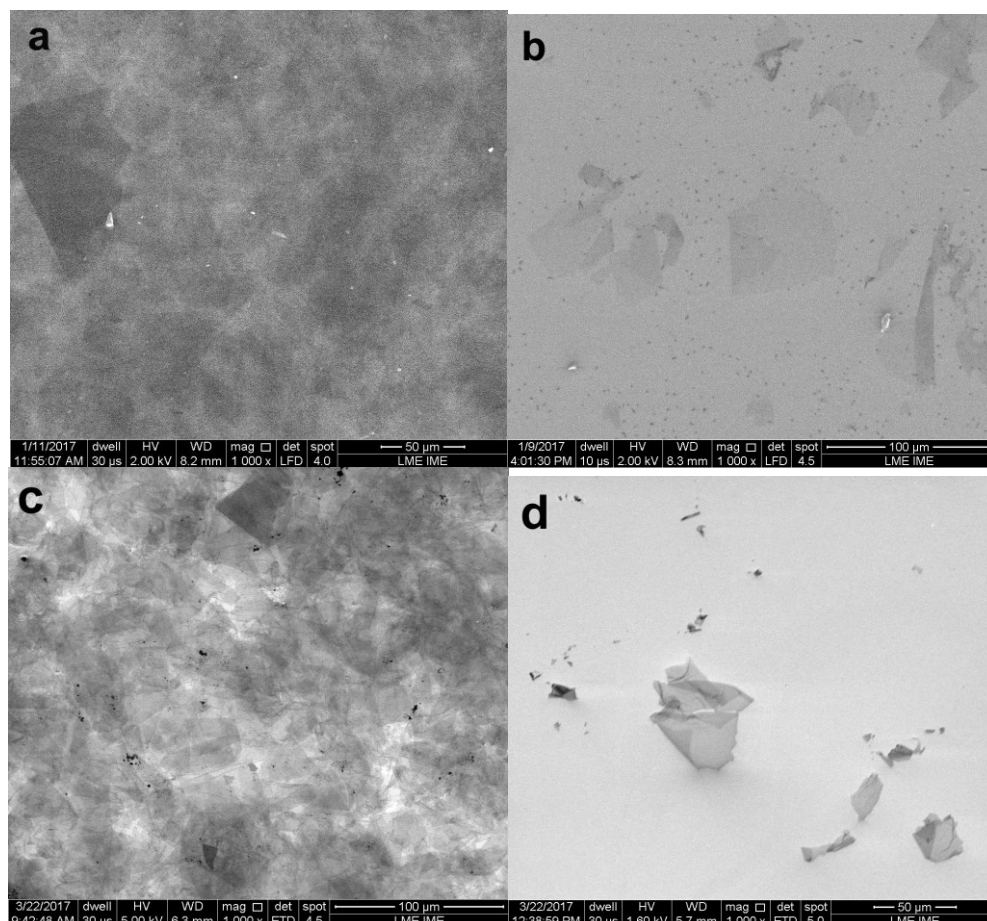

**Figura 5:** Imagens das amostras de GO e rGO/PSS com aumento de 1000 x (a) GO-7 dias, (b) rGO/PSS -7 dias, (c) GO-10 dias, (d) rGO/PSS -10 dias de oxidação.

O rGO/PSS (Figuras 4 (b), (d) e (f) e Figuras 5 (b) e (d)) exibiu ainda mais dobras ao longo das folhas analisadas, se comparado ao GO, o que pode estar relacionado a um maior grau de esfoliação, em virtude de as etapas de lavagem/centrifugação envolvidas durante a redução auxiliarem nessa separação de camadas, tornando o rGO mais flexível.

#### 4. CONCLUSÕES

Dispersões de óxido de grafeno e óxido de grafeno reduzido foram produzidas pelo método de Hummers modificado com sucesso. A relação de intensidade entre as bandas D e G, obtidas por espectroscopia Raman, apresentaram valores próximos a 1, relacionados a grande quantidade de defeitos em função dos grupos funcionais para o GO e relativos aos domínios presentes no rGO.

Os resultados de XPS revelaram o aumento do teor de oxigênio, e consequentemente a redução do teor de carbono, em função do aumento do tempo de oxidação para o GO. Para o rGO, esta tendência não foi observada, considerando que a etapa de redução visa eliminar o oxigênio. A relação carbono/oxigênio (C/O) para o GO foi em torno de 2 e para o rGO próxima de 3.

Por meio das análises de DRX foi verificado o deslocamento do pico referente à difração do plano (002), relacionado ao aumento da distância interplanar tanto para o GO quanto para rGO. Considerando o GO, o aumento do tempo de oxidação mostrou que o acréscimo de grupos funcionais influenciou na esfoliação entre as camadas de grafeno, com maior possibilidade de obtenção de monocamadas.

As imagens de MEV indicaram o aumento da transparência das folhas de GO com o aumento do tempo de oxidação, o que pode ser associado a um maior grau de esfoliação.

Finalmente, em termos de esfoliação das camadas de óxido de grafeno, pode-se concluir que o aumento do tempo de oxidação, até um máximo de 7 dias, aumentou a tendência à obtenção de folhas com poucas camadas ou monocamadas.

## 5. AGRADECIMENTOS

Os autores são gratos à empresa Nacional de Grafite em função do fornecimento do grafite utilizado como matéria-prima para realização deste trabalho, ao Alexandre Mello de Paula Silva por permitir a utilização do XPS no Centro Brasileiro de Pesquisas Físicas (CBPF) e ao Elvis Lopez Meza por todo auxílio prestado durante a realização das medidas de XPS, à Coordenação de Aperfeiçoamento de Pessoal de Nível Superior (CAPES) e à Fundação de Amparo à Pesquisa do Estado do Rio de Janeiro (FAPERJ) pelo apoio financeiro.

## 6. BIBLIOGRAFIA

- [1] FERRARI, A. C., BONACCORSO, F., FAL'KO, V., *et al.* "Science and technology roadmap for graphene, related two-dimensional crystals, and hybrid systems", *The Royal Society of Chemistry*, v. 7, n. 11, pp. 4587-5062, Mar. 2015.
- [2] JIANG, C., ZHOU, X., FANG, Q., *et al.*, "Copper-grapheme bulk composites with homogeneous graphene dispersion and enhanced mechanical properties", *Materials Science & Engineering A*, v. 654, n. 27, pp. 124-130, Jan. 2016.
- [3] ZHENG, Q.B., GUDARZI, M.M., WANG, S.J., *et al.*, "Improved electrical and optical characteristics of transparent grapheme thin films produced by acid and doping treatments", *Carbon*, v. 49, n. 9, pp. 2905-2916, Ago. 2011.
- [4] CHEN, J., CHI, F., HUANG, L., *et al.*, "Synthesis of graphene oxide sheets with controlled sizes from sieved graphite flakes", *Carbon*, v. 110, pp. 34-40, Dez. 2016.
- [5] HIRATA, M., GOTO, T., HORIUCHI, S., *et al.*, "Thin-film particles of graphite oxide 1: High-yield synthesis and flexibility of the particles", *Carbon*, v. 42, pp. 2929-2937, Jun. 2004.
- [6] CONTRERAS, J. F., BRIONES, F. C. "Graphene oxide powders with different oxidation degree, prepared by synthesis variations of the Hummers method", *Materials Chemistry and Physics*, v. 153, pp. 209-220, Jan. 2015.
- [7] ROURKE, J.P., PANDEY, P.A., MOORE, J.J., *et al.*, "The Real Graphene Oxide Revealed - Stripping the Oxidative Debris from the Graphene like Sheets", *Angew. Chem. Int. Ed.*, v. 50, n. 14, pp. 3173 -3177, Mar. 2011.
- [8] HUMMERS JR, W.S., OFFEMAN, R.E. "Preparation of Graphitic Oxide", *J. Am. Chem. Soc.*, v. 80 n. 6, pp. 1339-1339, Mar. 1958.
- [9] STANKOVICH, S., PINER, R.D., CHEN, X., *et al.*, "Stable aqueous dispersions of graphitic nanoplatelets via the reduction of exfoliated graphite oxide in the presence of poly(sodium 4-styrenesulfonate)", *Journal of Materials Chemistry*, v. 16, pp. 155-158, Nov. 2005.
- [10] FERNANDEZ-MERINO, M.J., GUARDIA, L., PAREDES, J.I., *et al.*, "Vitamin C Is an Ideal Substitute for Hydrazine in the Reduction of Graphene Oxide Suspensions", *J. Phys. Chem. C*, v. 114, n. 14, pp. 6426-6432, Mar. 2010.
- [11] KERN, W. RCA CRITICAL CLEANING PROCESS.  
[http://www.microtechprocess.com/pdf/MTS\\_RCA.pdf](http://www.microtechprocess.com/pdf/MTS_RCA.pdf). Acessado em novembro de 2016.
- [12] EIGLER, S., ENZELBERGER-HEIM, M., GRIMM, S., *et al.*, "Wet Chemical Synthesis of Graphene", *Advanced Materials*, v. 25, pp. 3583-3587, Mai. 2013.
- [13] CHUA, C.K., PUMERA, M. "Chemical reduction of graphene oxide: a synthetic chemistry viewpoint", *The Royal Society of Chemistry*, v. 43, n. 1, pp. 291-312, Out. 2013.
- [14] BIANCO, A., CHENG, H-M., ENOKI, T., GOTSI, Y., *et al.*, "All in the graphene family – A recommended nomenclature for two-dimensional carbon materials", *Carbon*, v. 65, pp. 1-6, 2013.
- [15] SWAIN, K.A., BAHADUR, D. "Enhanced Stability of Reduced Graphene Oxide Colloid Using Cross-Linking Polymers", *J. Phys. Chem. C*, v. 118, n. 18, pp. 9450-9457, Abr. 2014.
- [16] PRAKASH, A., CHANDRA, S., BAHADUR, D. "Structural, magnetic, and textural properties of iron oxide-reduced graphene oxide hybrids and their use for the electrochemical detection of chromium", *Carbon*, v. 50, n. 11, pp. 4209-4219, set. 2012.
- [17] PEI, S., CHENG, H-M. "The reduction of graphene oxide", *Carbon*, v. 50, n. 9, pp. 3210-3228, Ago. 2012.
- [18] PARK, S-H.; KIM, H-S. "Environmentally benign and facile reduction of graphene oxide by flash light irradiation", *Nanotechnology*, v. 26, n. 20, pp. 1-8, Abr. 2015.
